# Supplementary material for: Increased extracellular matrix density disrupts E-cadherin/β-catenin complex in gastric cancer cells
Source: Royal Society of Chemistry journal article supplement (doi:10.1039/c8bm00843d), 2018-01-01
Supplement: c8bm00843d1.pdf [file c8bm00843d1.pdf]

## Supplementary information

### **Increased extracellular matrix density disrupts E-cadherin/ $\beta$ -catenin complex in gastric cancer cells**

Minjeong Jang,<sup>a</sup> Ilkyoo Koh,<sup>a</sup> Jae Eun Lee,<sup>b</sup> Ju Yeon Lim,<sup>b</sup> Jae-Ho Cheong,<sup>\*b</sup>  
and Pilnam Kim<sup>\*a</sup>

<sup>a</sup>Department of Bio and Brain Engineering, Korea Advanced Institute of Science and Technology, Daejeon 34141, Korea.

<sup>b</sup>Department of Surgery, Severance Hospital, Yonsei University College of Medicine, Seoul 03722, Korea.

\* Corresponding author. Email: <sup>a</sup>[pkim@kaist.ac.kr](mailto:pkim@kaist.ac.kr), <sup>b</sup>[JHCHEONG@yuhs.ac](mailto:JHCHEONG@yuhs.ac)

\* Corresponding Author: Pilnam Kim, Department of Bio and Brain Engineering, Korea Advanced Institute of Science and Technology, Daejeon 34141, Korea. Phone: +82-42-350-4332; E-mail: [pkim@kaist.ac.kr](mailto:pkim@kaist.ac.kr), and Jae-Ho Cheong, Department of Surgery, Severance Hospital, Yonsei University College of Medicine, Seoul 03722, Korea. Phone: +82-2-2228-2094; Fax: +82-2-303-8289; E-mail: [JHCHEONG@yuhs.ac](mailto:JHCHEONG@yuhs.ac)

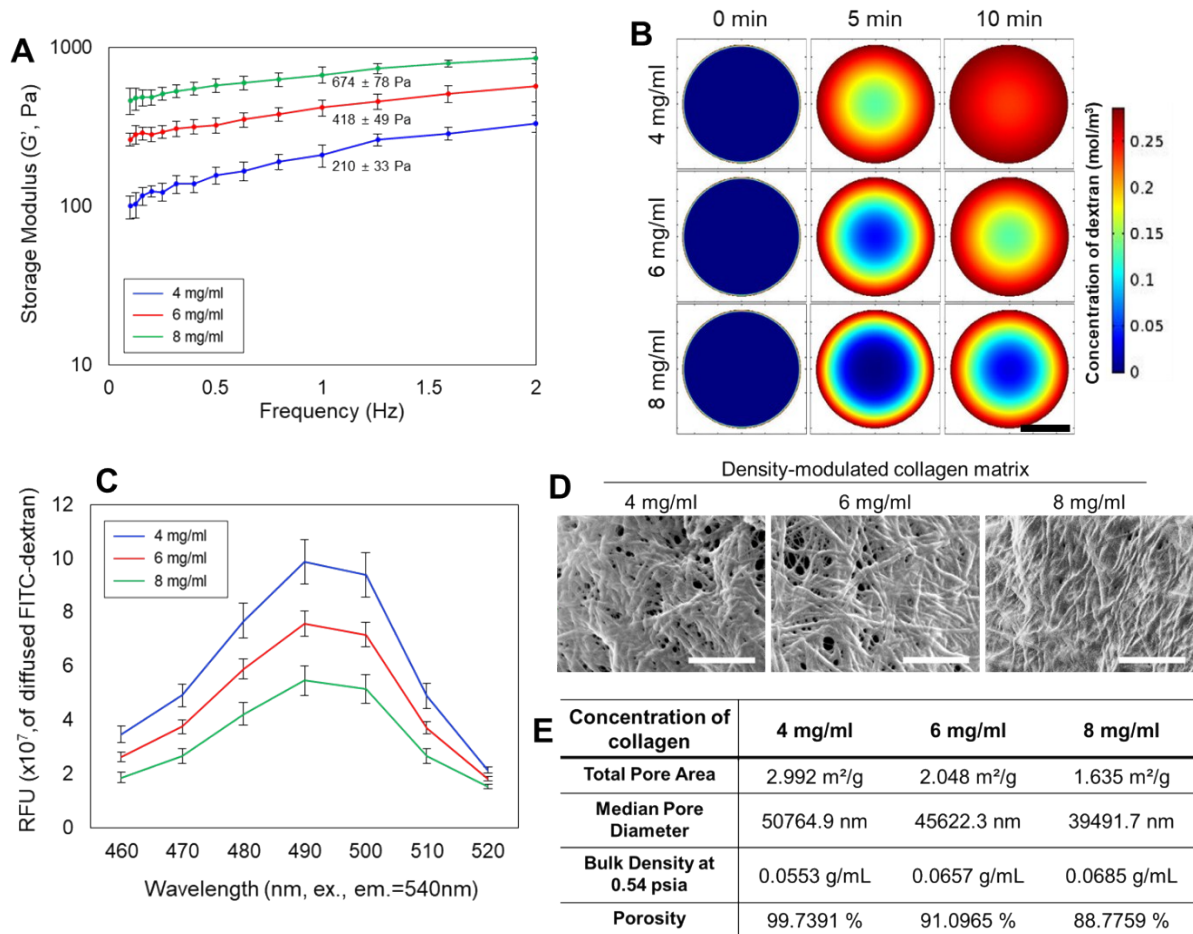

**Supplementary Figure S1. Characterization of density-varied collagen matrix (4, 6, and 8 mg/ml).** A. Storage modulus in 4, 6, and 8 mg/ml of collagen gels. B. COMSOL simulation of diffusion of FITC-dextran (70kDa) through density-varied collagen matrix. Scale bar = 200  $\mu$ m C. Permeability of fluorescein isothiocyanate (FITC)-dextran (70 kDa) in density-varied collagen matrix. With increased collagen density, the fluorescence intensity of FITC-dextran (70 kDa) diffused from the hydrogel increased ( $n = 3$ ). D. Scanning electron microscopy (SEM) images of collagen fiber matrices with varying density. Scale bar = 1  $\mu$ m. E. Evaluation of porosity depending on the concentration of collagen by mercury intrusion porosimetry (MIP).

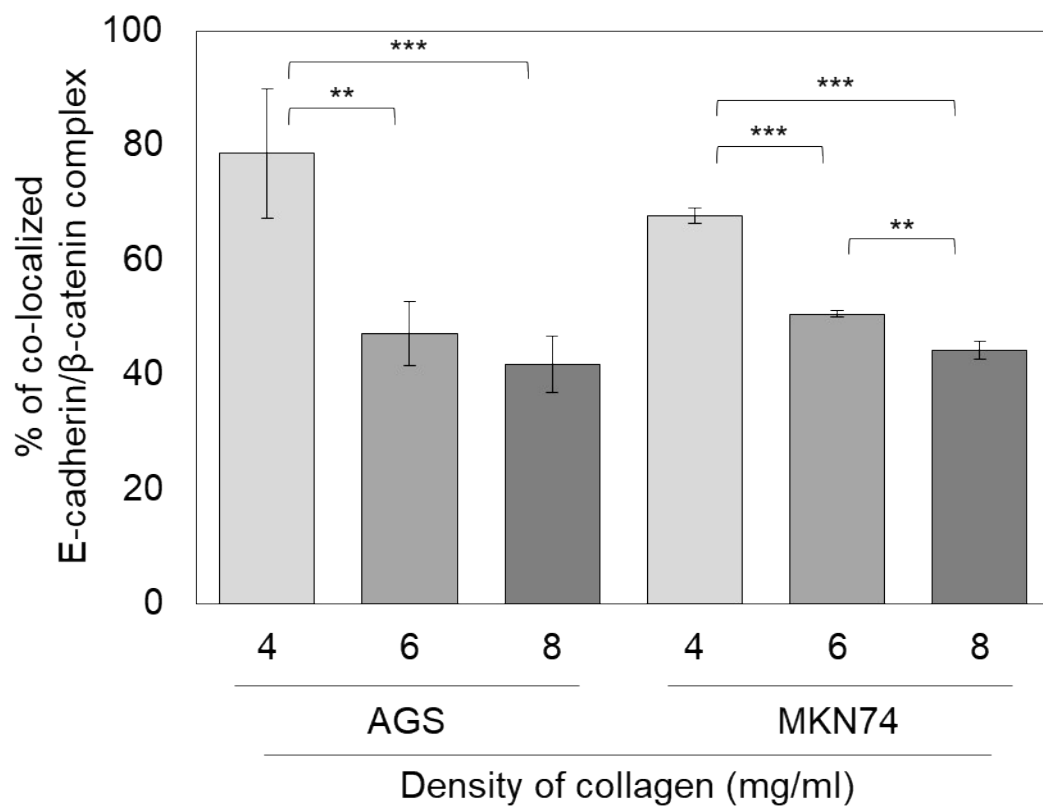

**Supplementary Figure S2.** Percentage of co-localized E-cadherin/β-catenin complex of AGS and MKN74 in density-varied collagen matrix (4~8 mg/ml) (n=3-5, \*\*:p<0.001, \*\*\*:p<0.001)

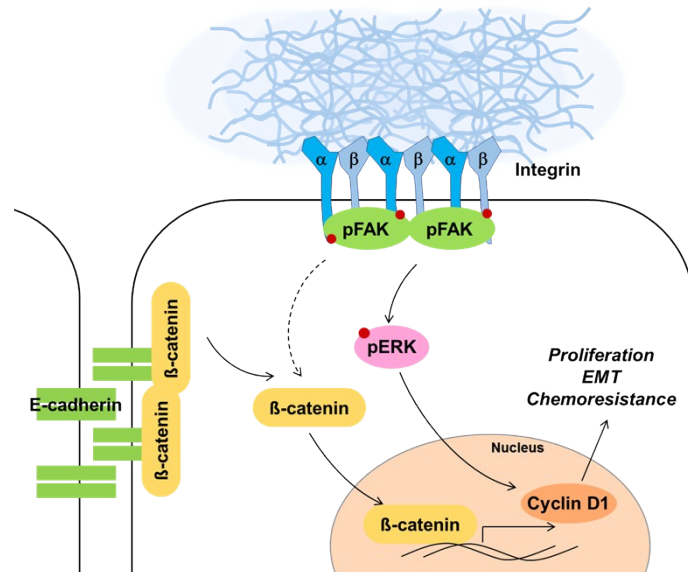

**Supplementary Figure S3.** Schematics of proposed integrin-mediated cell-ECM interaction and E-cadherin/ $\beta$ -catenin-mediated cell-cell adhesion depending on matrix density.

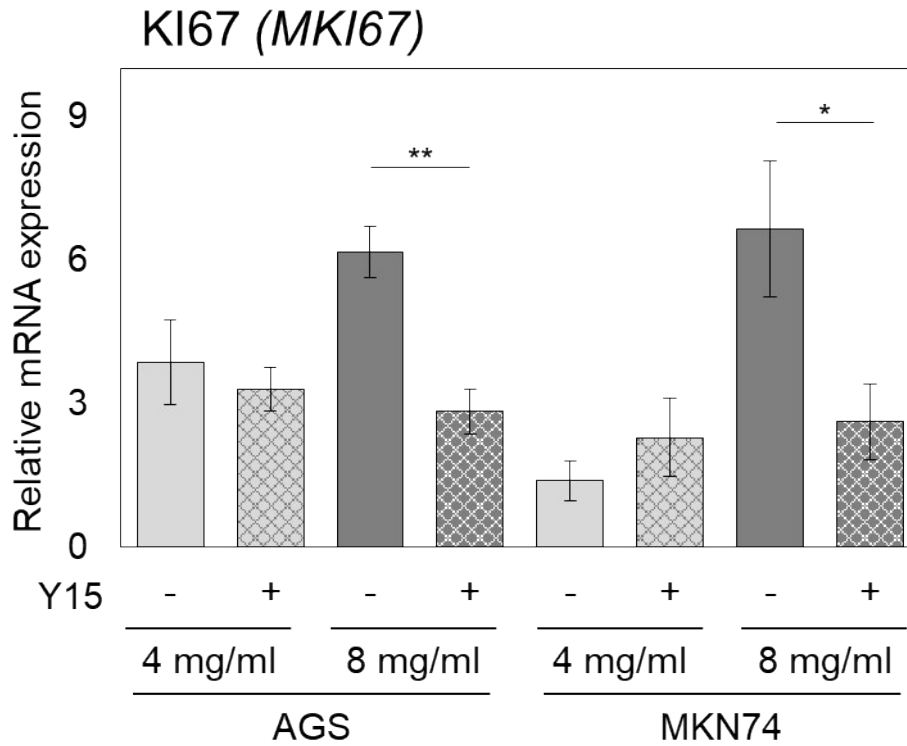

**Supplementary Figure S4. Effect of Y15 treatment on GC proliferation by collagen density.** Expression of the proliferation-related gene, *MKI67*, of GC cell lines, AGS and MKN74, in density-varied ECM by treating Y15. \*:p<0.05, \*\*:p<0.01

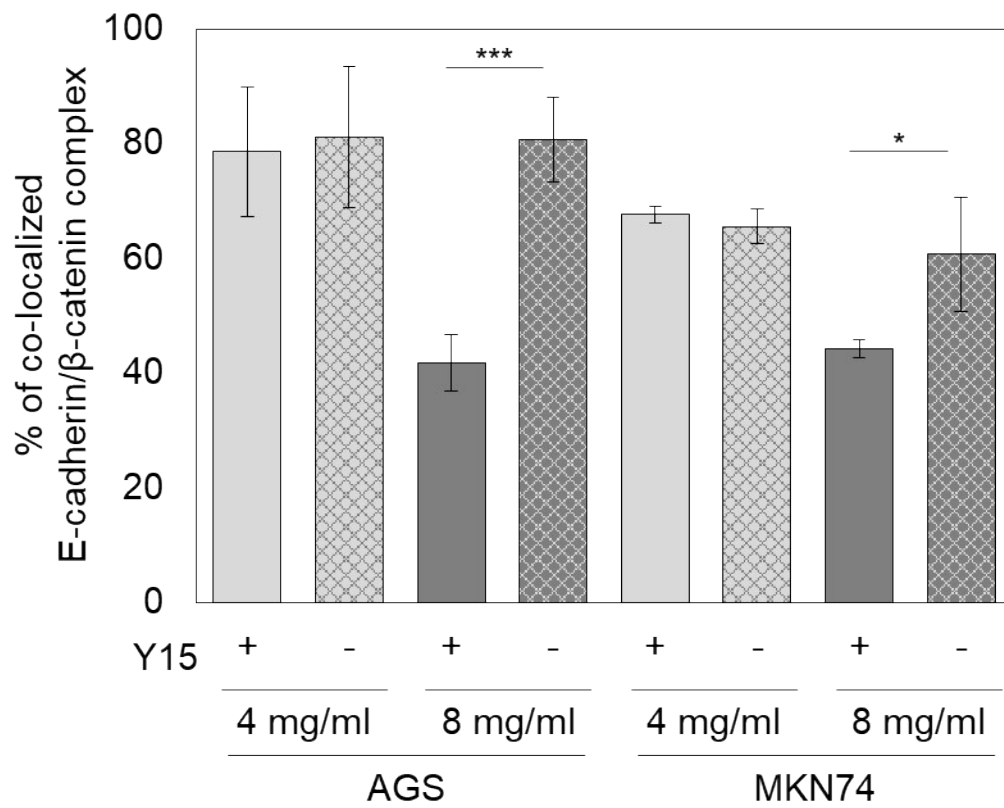

**Supplementary Figure S5.** Percentage of co-localized E-cadherin/β-catenin complex of GC cell lines, AGS and MKN74, in density-varied ECM by treating Y15. (n=3-5, \*:p<0.05, \*\*\*:p<0.001)

### A. AGS

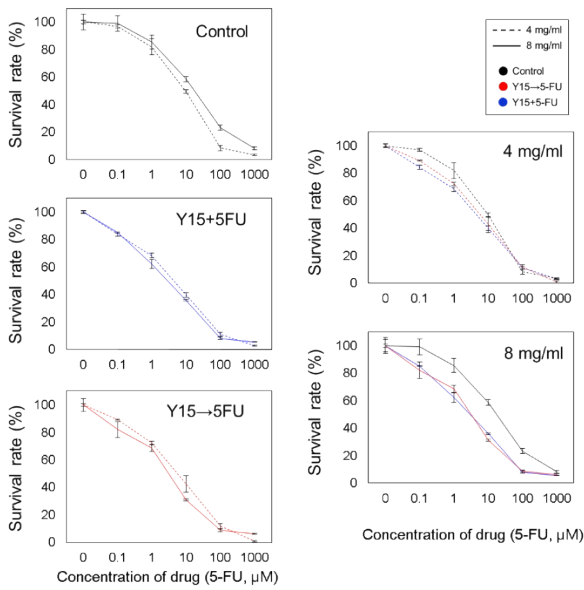

### B. MKN74

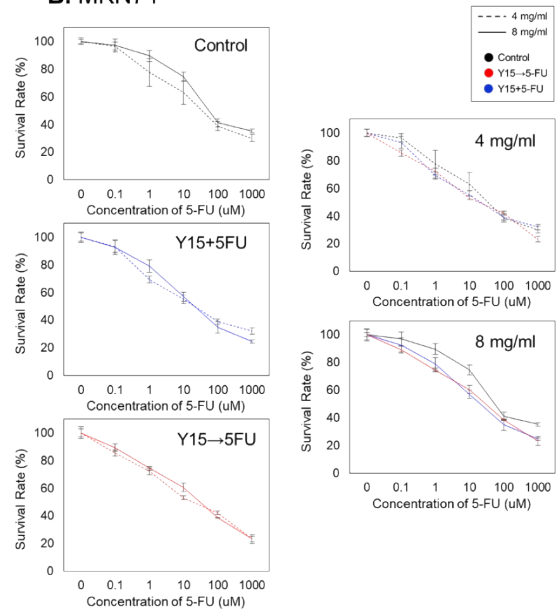

**Supplementary Figure S6. Dose-dependent survival rates were assessed in the presence of Y15.** A. The survival rates of AGS represented 4 mg/ml (dotted line) and 8 mg/ml (straight line) in a dose-dependent manner of 5-FU, without (black), with Y15 (blue), and after Y15 treatment (red). B. The survival rates of MKN74 represented 4 mg/ml (dotted line) and 8 mg/ml (straight line) in a dose-dependent manner of 5-FU, without (black), with Y15 (blue), and after Y15 treatment (red). Y15 affected drug resistance in a dense matrix.

| Gene                |   | Sequence                       | Refs.                      |
|---------------------|---|--------------------------------|----------------------------|
| <i>ITGB1</i>        | F | CAA GAG AGC TGA AGA CTA TCC CA | PrimerBank ID: 182507160c3 |
|                     | R | TGA AGT CCG AAG TAA TCC TCC T  |                            |
| <i>PTK2</i>         | F | CCA GGA GAG AAT GAA GCA AA     |                            |
|                     | R | CAA CAA ACT AAA GGG AGG GTAT   |                            |
| <i>MAPK1 (ERK2)</i> | F | TCT GGA GCA GTA TTA CGA CCC    | PrimerBank ID: 75709179c3  |
|                     | R | CTG GCT GGA ATC TAG CAG TCT    |                            |
| <i>MAPK3 (ERK1)</i> | F | CTA CAC GCA GTT GCA GTA CAT    | PrimerBank ID: 91718898c1  |
|                     | R | CAG CAG GAT CTG GAT CTC CC     |                            |
| <i>CCND1</i>        | F | CAA TGA CCC CGC ACG ATT TC     | PrimerBank ID: 77628152c3  |
|                     | R | CAT GGA GGG CGG ATT GGA A      |                            |
| <i>MKI67</i>        | F | GGT GCT TGA GGT CTG CTA        |                            |
|                     | R | CTG CTT CTC CTT TCC CTT TC     |                            |
| <i>GAPDH</i>        | F | GTA TGA CAA CAG CCT CAA GAT    |                            |
|                     | R | AGT CCT TCC ACG ATA CCA AA     |                            |

**Supplementary Table 1. Primer sequences.** Forward (F) and Reverse (R) primer sequence summarized. Target genes are *ITGB1*, *PTK2*, *MAPK1/3*, *CCND1*, *MKI67* and *GAPDH*.
